# Supplementary material for: Caffeine Intake among Undergraduate Students: Sex Differences, Sources, Motivations, and Associations with Smoking Status and Self-Reported Sleep Quality
Source: MDPI journal article supplement (doi:10.3390/nu14081661), 2022-04-16
Supplement: s1 [file s1]

**Table S1.** Multivariate regression analysis for daily caffeine intake (mg·day<sup>-1</sup>) in men.

| Variable         | B       | β     | 95%CI           | t     | p value | R <sup>2</sup> | Adjusted R <sup>2</sup> | R <sup>2</sup> change |
|------------------|---------|-------|-----------------|-------|---------|----------------|-------------------------|-----------------------|
| Smoking          | 100.363 | 0.227 | 48.051, 152.674 | 3.777 | <0.001* | 0.118          | 0.115                   | 0.118                 |
| Alcohol          | 72.098  | 0.203 | 33.582, 110.614 | 3.685 | <0.001* | 0.155          | 0.149                   | 0.037                 |
| Age              | 13.692  | 0.183 | 5.752, 21.632   | 3.395 | 0.001*  | 0.194          | 0.185                   | 0.039                 |
| Cannabis         | 93.472  | 0.149 | 20.777, 166.167 | 2.531 | 0.012*  | 0.211          | 0.199                   | 0.016                 |
| Fruit/Vegetables | 12.394  | 0.112 | 0.440, 17.686   | 2.069 | 0.039*  | 0.223          | 0.209                   | 0.012                 |

Model:  $p < 0.001$  (ANOVA). B: regression coefficient;  $\beta$ : standardized beta coefficient. The positive coefficients for smoking, alcohol and cannabis indicate higher values for caffeine intake in consumers of these substances than in non-consumers. \*  $p < 0.05$  indicates significant predictors or R<sup>2</sup> changes.  $n = 278$ .

**Table S2.** Multivariate regression analysis for daily caffeine intake (mg·day<sup>-1</sup>) in women.

| Variable         | B      | β     | 95%CI           | t     | p value | R <sup>2</sup> | Adjusted R <sup>2</sup> | R <sup>2</sup> change |
|------------------|--------|-------|-----------------|-------|---------|----------------|-------------------------|-----------------------|
| Smoking          | 79.404 | 0.153 | 38.041, 120.767 | 3.540 | <0.001* | 0.034          | 0.032                   | 0.034                 |
| Fruit/Vegetables | 13.975 | 0.166 | 7.515, 20.434   | 3.770 | <0.001* | 0.064          | 0.061                   | 0.030                 |
| Alcohol          | 50.690 | 0.116 | 16.747, 84.632  | 4.249 | 0.003*  | 0.078          | 0.073                   | 0.014                 |
| Cannabis         | 80.771 | 0.081 | 1.930, 159.612  | 2.933 | 0.045*  | 0.084          | 0.078                   | 0.006                 |
| Age              | 1.786  | 0.021 | -4.965, 8.537   | 2.012 | 0.604   |                |                         |                       |

Model:  $p < 0.001$  (ANOVA). B: regression coefficient;  $\beta$ : standardized beta coefficient. The positive coefficient for smoking indicates higher values for caffeine intake in smokers than in non-smokers. \*  $p < 0.05$  indicates significant predictors or R<sup>2</sup> changes.  $n = 608$ .

**Table S3.** Logistic regression analysis for coffee and instant coffee intake

| Variable                                       | Coffee      |              |         | Instant coffee |              |         |
|------------------------------------------------|-------------|--------------|---------|----------------|--------------|---------|
|                                                | OR adjusted | 95%CI        | p value | OR adjusted    | 95%CI        | p value |
| Sex (Reference men)                            | 1.379       | 1.019, 1.866 | 0.037*  | 1.773          | 1.113, 2.826 | 0.016*  |
| Age                                            | 1.087       | 1.015, 1.164 | 0.017*  | 0.946          | 0.858, 1.044 | 0.273   |
| Smoking (Reference non-smokers)                | 2.671       | 1.673, 4.264 | <0.001* | 1.368          | 0.779, 2.403 | 0.275   |
| Cannabis consumption (Reference non-consumers) | 1.444       | 0.656, 3.178 | 0.361   | 1.242          | 0.481, 3.207 | 0.654   |
| Alcohol consumption (Reference non-consumers)  | 2.496       | 1.778, 3.503 | <0.001* | 0.842          | 0.529, 1.341 | 0.469   |
| Daily fruit and vegetable servings             | 1.137       | 1.061, 1.219 | <0.001* | 1.009          | 0.920, 1.108 | 0.844   |

\* $p < 0.05$  indicates significant odds ratios (OR).

**Table S4.** Logistic regression for tea/mate and chocolate intake

| Variable                                              | Tea/Mate    |              |         | Chocolate   |              |         |
|-------------------------------------------------------|-------------|--------------|---------|-------------|--------------|---------|
|                                                       | OR adjusted | 95%CI        | p value | OR adjusted | 95%CI        | p value |
| <b>Sex</b> (Reference men)                            | 2.689       | 1.906, 3.793 | <0.001* | 1.252       | 0.938, 1.671 | 0.127   |
| <b>Age</b>                                            | 1.041       | 0.971, 1.116 | 0.261   | 0.976       | 0.915, 1.041 | 0.462   |
| <b>Smoking</b> (Reference non-smokers)                | 0.819       | 0.523, 1.282 | 0.382   | 0.755       | 0.503, 1.134 | 0.175   |
| <b>Cannabis consumption</b> (Reference non-consumers) | 2.045       | 0.984, 4.251 | 0.055   | 1.508       | 0.750, 3.032 | 0.249   |
| <b>Alcohol consumption</b> (Reference non-consumers)  | 1.083       | 0.761, 1.540 | 0.659   | 1.223       | 0.888, 1.686 | 0.218   |
| <b>Daily fruit and vegetable servings</b>             | 1.166       | 1.088, 1.249 | <0.001* | 1.000       | 0.938, 1.067 | 0.993   |

\*  $p < 0.05$  indicates significant odds ratios (OR).

**Table S5.** Logistic regression for cola and energy drinks intake

| Variable                                              | Cola drinks |              |         | Energy drinks |              |         |
|-------------------------------------------------------|-------------|--------------|---------|---------------|--------------|---------|
|                                                       | OR adjusted | 95%CI        | p value | OR adjusted   | 95%CI        | p value |
| <b>Sex</b> (Reference men)                            | 1.030       | 0.748, 1.417 | 0.858   | 0.378         | 0.243, 0.588 | <0.001* |
| <b>Age</b>                                            | 1.064       | 0.993, 1.141 | 0.080   | 0.999         | 0.900, 1.109 | 0.992   |
| <b>Smoking</b> (Reference non-smokers)                | 2.103       | 1.389, 3.186 | <0.001* | 1.993         | 1.129, 3.519 | 0.017*  |
| <b>Cannabis consumption</b> (Reference non-consumers) | 0.490       | 0.228, 1.053 | 0.067   | 2.076         | 0.914, 4.715 | 0.081   |
| <b>Alcohol consumption</b> (Reference non-consumers)  | 2.116       | 1.427, 3.137 | <0.001* | 1.208         | 0.688, 2.122 | 0.510   |
| <b>Daily fruit and vegetable servings</b>             | 0.961       | 0.895, 1.033 | 0.283   | 0.969         | 0.868, 1.082 | 0.576   |

\*  $p < 0.05$  indicates significant odds ratios (OR).

**Table S6.** Multivariate regression analysis for subjective sleep quality in men

| Variable         | B      | $\beta$ | 95%CI          | t      | p value | R <sup>2</sup> | Adjusted R <sup>2</sup> | R <sup>2</sup> change |
|------------------|--------|---------|----------------|--------|---------|----------------|-------------------------|-----------------------|
| Caffeine         | 0.003  | 0.137   | 0.000, 0.006   | 2.304  | 0.022*  | 0.035          | 0.028                   | 0.019                 |
| Age              | -0.027 | -0.016  | -0.228, 0.174  | -0.262 | 0.794   |                |                         |                       |
| Fruit/Vegetables | -0.248 | -0.137  | -0.460, -0.037 | -2.310 | 0.022*  | 0.016          | 0.013                   | 0.016                 |
| Smoking          | 0.809  | 0.082   | -0.521, 2.140  | 1.198  | 0.232   |                |                         |                       |
| Cannabis         | -1.168 | -0.083  | -2.992, 0.655  | -1.261 | 0.295   |                |                         |                       |

Regression model:  $p=0.007$  (ANOVA). B: regression coefficient;  $\beta$ : standardized beta coefficient. Caffeine: caffeine intake (mg/day); Fruit/Vegetables: servings of daily fruit and vegetables intake. The positive coefficient for sex indicates higher values of MOS Sleep in women than in men. \*  $p < 0.05$  indicates significant predictors or R<sup>2</sup> changes.  $n = 278$ .

**Table S7.** Multivariate regression analysis for subjective sleep quality in women

| Variable         | B      | $\beta$ | 95%CI          | t      | p value | R <sup>2</sup> | Adjusted R <sup>2</sup> | R <sup>2</sup> change |
|------------------|--------|---------|----------------|--------|---------|----------------|-------------------------|-----------------------|
| Caffeine         | 0.005  | 0.215   | 0.003, 0.006   | 5.338  | <0.001* | 0.039          | 0.038                   | 0.039                 |
| Age              | -0.095 | -0.050  | -0.244, 0.050  | -1.252 | 0.211   |                |                         |                       |
| Fruit/Vegetables | -0.180 | -0.099  | -0.324, -0.036 | -2.452 | 0.014*  | 0.049          | 0.046                   | 0.006                 |
| Smoking          | 0.055  | 0.005   | -0.872, 0.982  | 0.117  | 0.907   |                |                         |                       |
| Cannabis         | -0.639 | -0.029  | -2.390, 1.112  | -0.717 | 0.474   |                |                         |                       |

Regression model:  $p < 0.001$  (ANOVA). B: regression coefficient;  $\beta$ : standardized beta coefficient. Caffeine: caffeine intake (mg/day); Fruit/Vegetables: servings of daily fruit and vegetables intake. The positive coefficient for sex indicates higher values of MOS Sleep in women than in men. \*  $p < 0.05$  indicates significant predictors or R<sup>2</sup> changes.  $n = 806$ .

**Table S8.** Results of the Caffeine Motives Questionnaire (%)

| CMQ                                     | All<br>( $n=807$ ) | Men<br>( $n=243$ ) | Women<br>( $n=564$ ) | p value (Cohen's d) |
|-----------------------------------------|--------------------|--------------------|----------------------|---------------------|
| CMQ Global (%)                          | 19.29 $\pm$ 10.88  | 18.43 $\pm$ 10.80  | 19.64 $\pm$ 10.90    | 0.262 (0.112)       |
| CMQ Factor 1-Cognitive enhancement (%)  | 38.79 $\pm$ 25.74  | 37.11 $\pm$ 24.73  | 39.45 $\pm$ 26.13    | 0.363 (-0.091)      |
| CMQ Factor 2-Negative affect relief (%) | 8.81 $\pm$ 17.54   | 7.98 $\pm$ 16.75   | 9.14 $\pm$ 17.85     | 0.508 (-0.066)      |
| CMQ Factor 3-Reinforcing effects (%)    | 15.19 $\pm$ 10.86  | 14.98 $\pm$ 11.16  | 15.28 $\pm$ 10.74    | 0.784 (-0.027)      |
| CMQ Factor 4-Weight control (%)         | 3.13 $\pm$ 8.75    | 1.84 $\pm$ 6.48    | 3.65 $\pm$ 9.46      | 0.016* (-0.206)     |

CMQ: Caffeine Motives Questionnaire. \*  $p < 0.05$  Indicates significant differences between men and women, as determined by Student's t-test for unpaired data. Results are expressed as mean  $\pm$  SD of the percentage of the score range. Cohen's d value is provided as a measure of effect size.

**Table S9.** Motivations for caffeine consumption

| <b>CMQ<br/>(Score range)</b>                            | <b>All<br/>(n=807)</b> | <b>Men<br/>(n=243)</b> | <b>Women<br/>(n=564)</b> | <b>p value (Cohen's d)</b> |
|---------------------------------------------------------|------------------------|------------------------|--------------------------|----------------------------|
| To feel more alert                                      | 2.27 ± 1.38            | 2.04 ± 1.25            | 2.37 ± 1.41              | 0.011* (-0.244)            |
| To combat a headache                                    | 1.28 ± 0.77            | 1.20 ± 0.63            | 1.31 ± 0.82              | 0.102 (0.146)              |
| To help me concentrate                                  | 2.53 ± 1.42            | 2.49 ± 1.38            | 2.54 ± 1.44              | 0.675 (-0.042)             |
| Because I like the taste of caffeinated beverages       | 3.32 ± 1.41            | 3.40 ± 1.37            | 3.29 ± 1.42              | 0.433 (0.078)              |
| To help deal with stress in my daily life               | 1.53 ± 0.97            | 1.51 ± 0.99            | 1.54 ± 0.96              | 0.758 (-0.031)             |
| To help deal with anxiety                               | 1.29 ± 0.76            | 1.23 ± 0.63            | 1.32 ± 0.81              | 0.191 (-0.117)             |
| To help deal with depression                            | 1.24 ± 0.75            | 1.22 ± 0.72            | 1.24 ± 0.76              | 0.789 (-0.027)             |
| To combat drowsiness                                    | 2.75 ± 1.60            | 2.72 ± 1.62            | 2.80 ± 1.60              | 0.278 (-0.109)             |
| Because it is convenient to drink caffeinated beverages | 1.11 ± 0.46            | 1.20 ± 0.64            | 1.07 ± 0.35              | 0.028* (0.279)             |
| To help me focus my attention                           | 2.51 ± 1.46            | 2.42 ± 1.38            | 2.55 ± 1.48              | 0.394 (-0.085)             |
| Because I like the "jolt" of energy rush that I feel    | 2.02 ± 1.22            | 2.11 ± 1.31            | 1.99 ± 1.32              | 0.369 (0.090)              |
| To help me relax or calm down                           | 1.42 ± 0.87            | 1.51 ± 1.02            | 1.38 ± 0.81              | 0.177 (0.150)              |
| To stay awake                                           | 3.23 ± 1.46            | 3.24 ± 1.44            | 3.32 ± 1.48              | 0.939 (0.008)              |
| As a social past time                                   | 1.96 ± 1.16            | 1.89 ± 1.15            | 1.99 ± 1.16              | 0.381 (-0.088)             |
| Because it is an ingredient in my diet pills            | 1.02 ± 0.21            | 1.03 ± 0.21            | 1.02 ± 0.21              | 0.673 (0.042)              |
| Because I crave caffeine                                | 1.27 ± 0.74            | 1.26 ± 0.74            | 1.28 ± 0.74              | 0.848 (-0.019)             |
| As a reward to myself for completing a task             | 1.23 ± 0.61            | 1.13 ± 0.43            | 1.26 ± 0.66              | 0.008* (-0.224)            |
| Seeing others ingest caffeine makes me crave it         | 1.14 ± 0.50            | 1.11 ± 0.45            | 1.15 ± 0.52              | 0.507 (-0.066)             |
| Because it is a powerful diuretic                       | 1.17 ± 0.61            | 1.09 ± 0.44            | 1.20 ± 0.67              | 0.022* (-0.194)            |
| Because it puts me in a better mood                     | 1.73 ± 1.13            | 1.68 ± 1.04            | 1.76 ± 1.16              | 0.494 (-0.068)             |
| To help lose or control my weight                       | 1.18 ± 0.62            | 1.11 ± 0.49            | 1.21 ± 0.67              | 0.053 (-0.170)             |

Values are the mean ± SD. \* $p < 0.05$  Indicates significant differences between men and women, as determined by Student's t-test for unpaired data. Cohen's d value is provided as a measure of effect size.
